# Supplementary material for: Random forest versus logistic regression: a large-scale benchmark experiment
Source: PubMed Central journal article supplement (PMC6050737; doi:10.1186/s12859-018-2264-5), 2018-07-17

## Additional file 2: Datasets from biosciences/medicine

### Main results

We see on Figure 1, which is the equivalent for the 67 datasets from biosciences/medicine of Figure 3 from the paper, that RF performs better than LR for all three measures, but that this superiority is more pronounced for *auc* and *brier*. RF is ranked first for 55 % of the datasets for *acc*, 63 % for *auc* and 63% for *brier*.

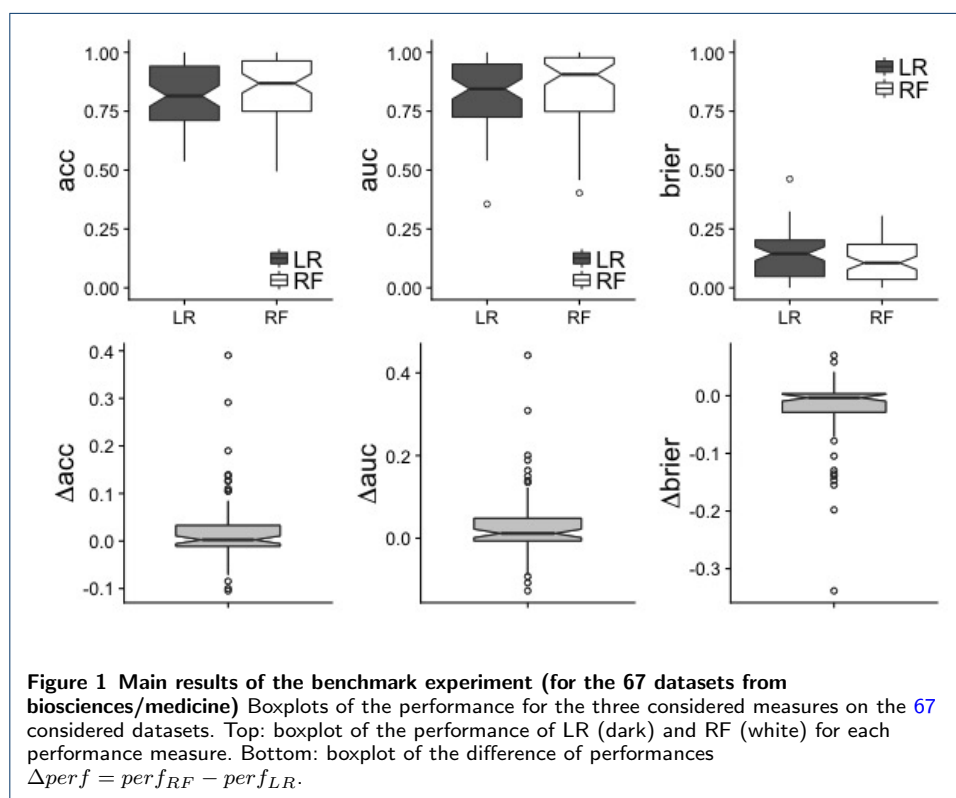

Similarly to Table 2 from the paper, Table 1 shows the mean, standard deviation and bootstrap BCa confidence interval of the mean for the performances (according to the three measures *acc*, *auc* and *brier*) of RF and LR and their difference, but for the 67 datasets from biosciences/medicine.

**Table 1** Performances of LR and RF (for the 67 datasets from biosciences/medicine) (top: accuracy, middle: AUC, bottom: Brier score): mean performance  $\mu$ , standard deviation  $\sigma$  and confidence interval for the mean (estimated via the bootstrap BCa method). It can be seen from this table that RF performs significantly better than LR for all three measures.

| <b>acc</b>          | $\mu$   | $\sigma$ | BCa confidence interval |
|---------------------|---------|----------|-------------------------|
| Logistic regression | 0.813   | 0.136    | [0.779, 0.842]          |
| Random forest       | 0.837   | 0.138    | [0.802, 0.868]          |
| Difference          | 0.024   | 0.0080   | [0.008, 0.048]          |
| <b>auc</b>          |         |          |                         |
| Logistic regression | 0.818   | 0.149    | [0.779, 0.851]          |
| Random forest       | 0.850   | 0.156    | [0.809, 0.886]          |
| Difference          | 0.032   | 0.089    | [0.014, 0.061]          |
| <b>brier</b>        |         |          |                         |
| Logistic regression | 0.139   | 0.100    | [0.117, 0.163]          |
| Random forest       | 0.114   | 0.086    | [0.094, 0.136]          |
| Difference          | -0.0245 | 0.064    | [-0.043, -0.0012]       |

### Subgroup analyses: meta-features

Figure 2 is the equivalent—for the 67 datasets from biosciences/medicine—of Figure 5 from the paper: it displays the differences between the accuracies of RF and LR in different subgroup of datasets. We observe no noticeable differences between the results for these 67 datasets and the results for all datasets.

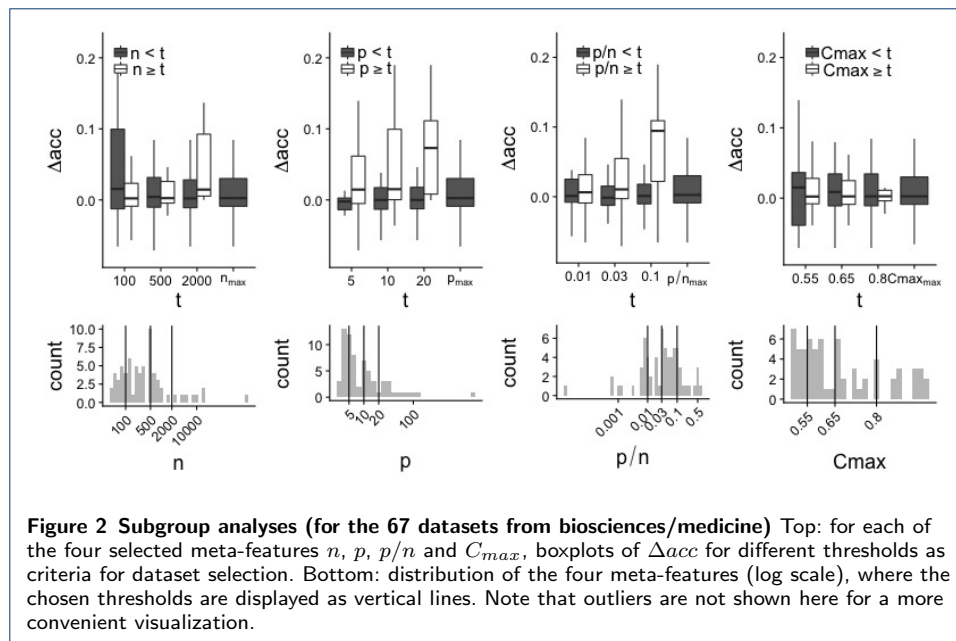

## Meta-learning

Figure 3 is the equivalent—for the 67 datasets from biosciences/medicine—of Figure 6 from the paper. Again, we do not observe any noticeable difference between the two figures.

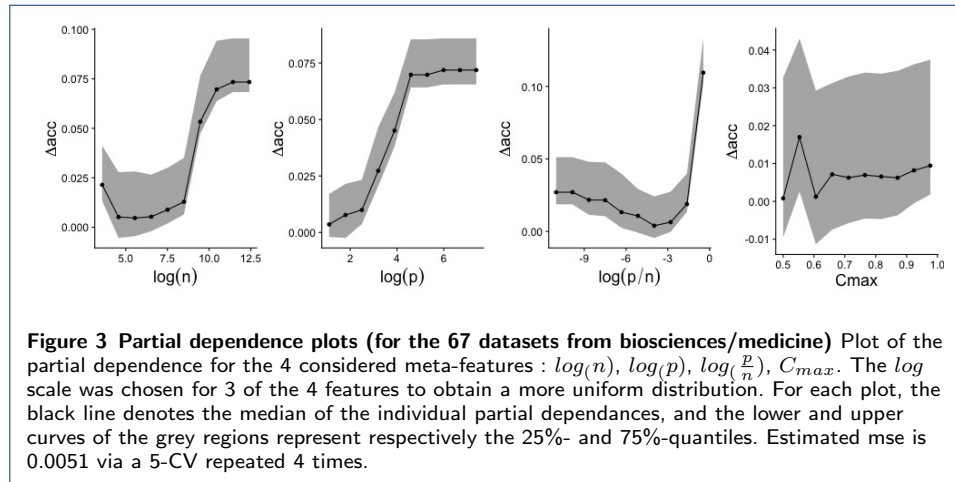

### Comparison biosciences/medicine versus other fields

We finally compare the results obtained for the 67 datasets from biosciences/medicine and the results obtained for datasets from other fields. More precisely, Figure 4 displays the boxplots of the differences  $\Delta acc$ ,  $\Delta auc$  and  $\Delta brier$  between RF and LR for datasets from other fields (grey) and datasets from biosciences/medicine (white). These boxplots are those displayed in the bottom row of Figure 3 from the paper and Figure 1 from this additional file.

It can be seen from Figure 4 that the superiority of RF over LR is slightly more pronounced for datasets from other fields than for datasets from biosciences/medicine (the white boxplots are closer to 0 than the grey boxplots). However, the difference between datasets from biosciences/medicine and datasets from other fields is not significantly different from 0 according to the two-sample t-test (for all three measures  $acc$ ,  $auc$  and  $brier$ ).

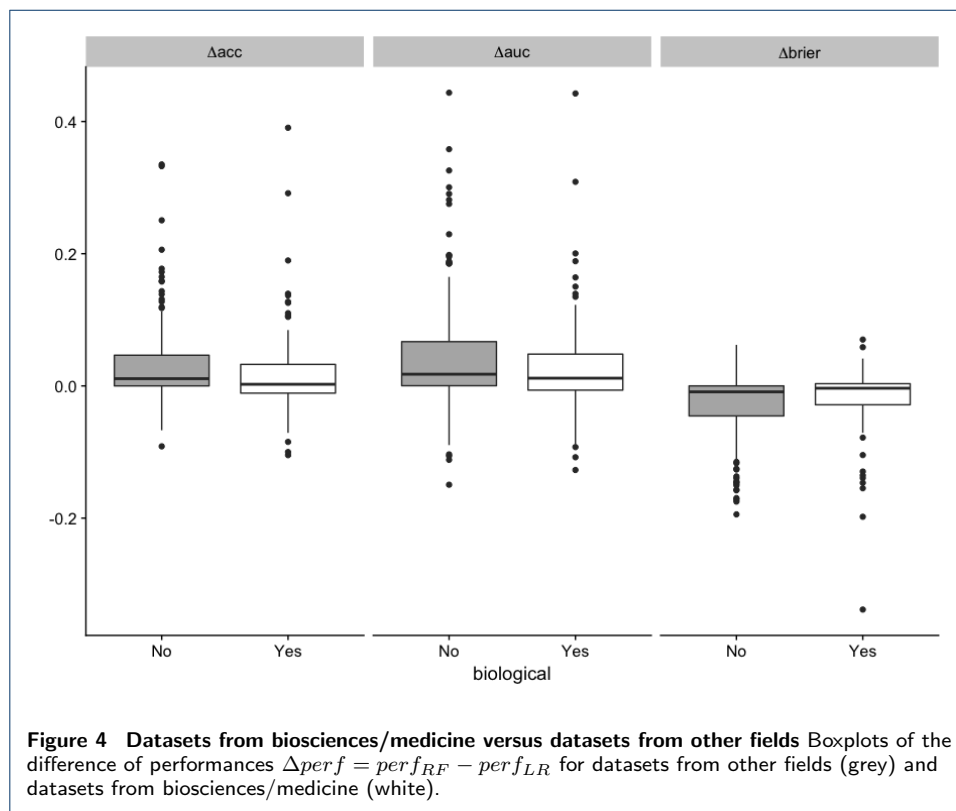

Supplement: 12859_2018_2264_MOESM2_ESM.pdf [file 12859_2018_2264_MOESM2_ESM.pdf]
