# Supplementary material for: Random forest versus logistic regression: a large-scale benchmark experiment
Source: PubMed Central journal article supplement (PMC6050737; doi:10.1186/s12859-018-2264-5), 2018-07-17

## Additional File 1: Additional results on subgroup analyses

This figure shows the overall results for the inclusion criteria, extending Figure 5 for *auc* and *brier* and (in contrast to Figure 5) also displaying outlying values. We observe that results for different performance measures are close, with similar trends for the boxplots.

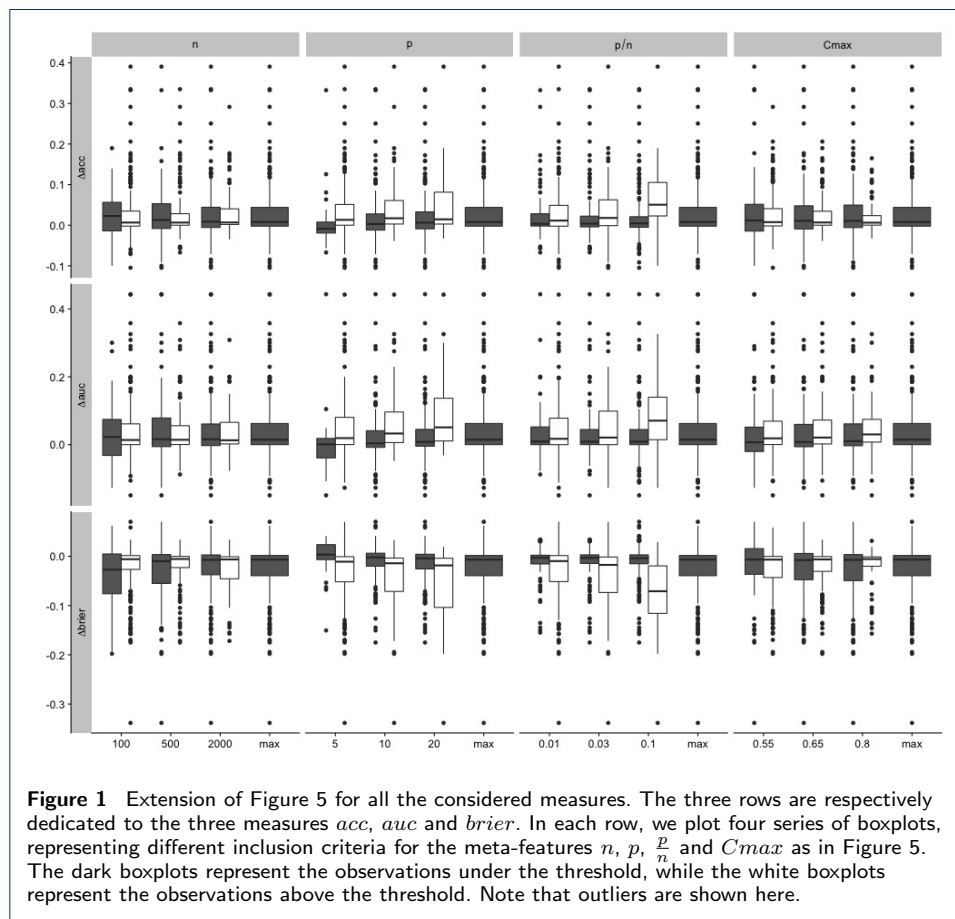

Supplement: 12859_2018_2264_MOESM1_ESM.pdf [file 12859_2018_2264_MOESM1_ESM.pdf]
