# Supplementary material for: Random forest versus logistic regression: a large-scale benchmark experiment
Source: PubMed Central journal article supplement (PMC6050737; doi:10.1186/s12859-018-2264-5), 2018-07-17
Supplement: 12859_2018_2264_MOESM4_ESM.pdf [file 12859_2018_2264_MOESM4_ESM.pdf]

## Additional file 4: Results with tuned random forest (TRF)

### Benchmark study comparing LR, RF and TRF

This figure displays in the top panel the boxplots of  $acc$ ,  $auc$  and brier score of the three methods LR, RF and TRF for the 76 datasets from biosciences/medicine. Furthermore, it also shows in the bottom panel the differences  $\Delta acc$ ,  $\Delta auc$  and  $\Delta brier$  between RF and LR (grey) and between TRF and LR (white), respectively.

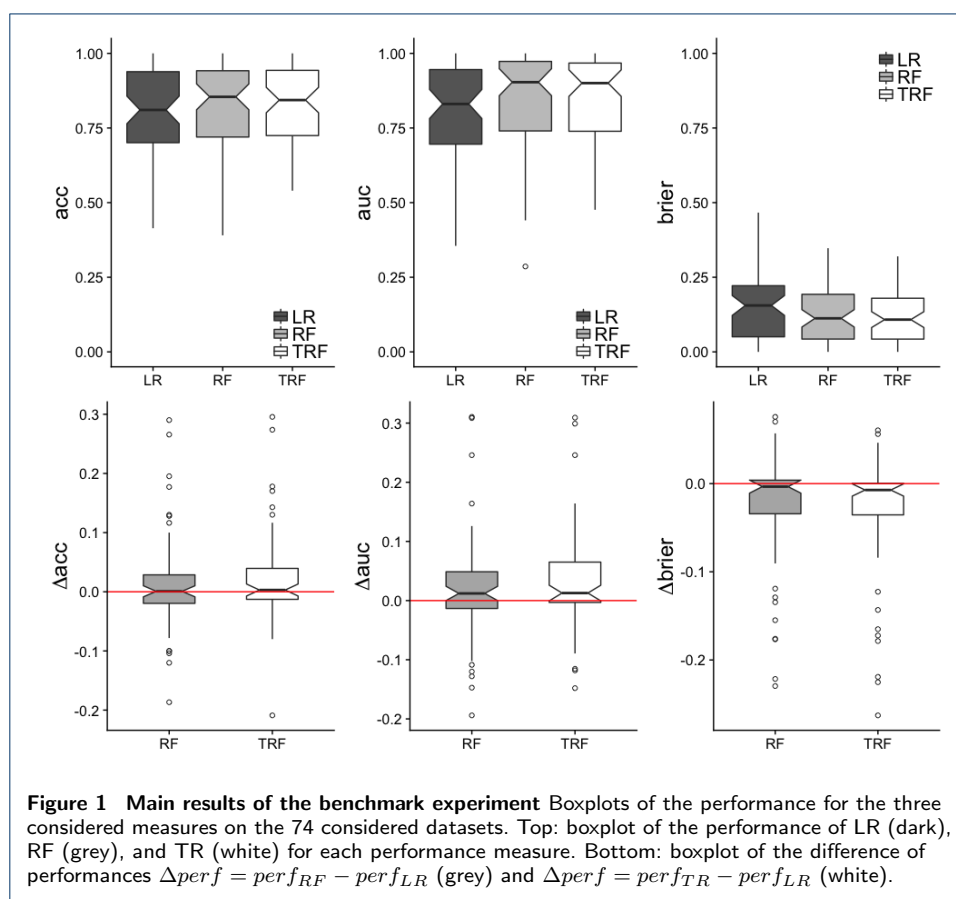

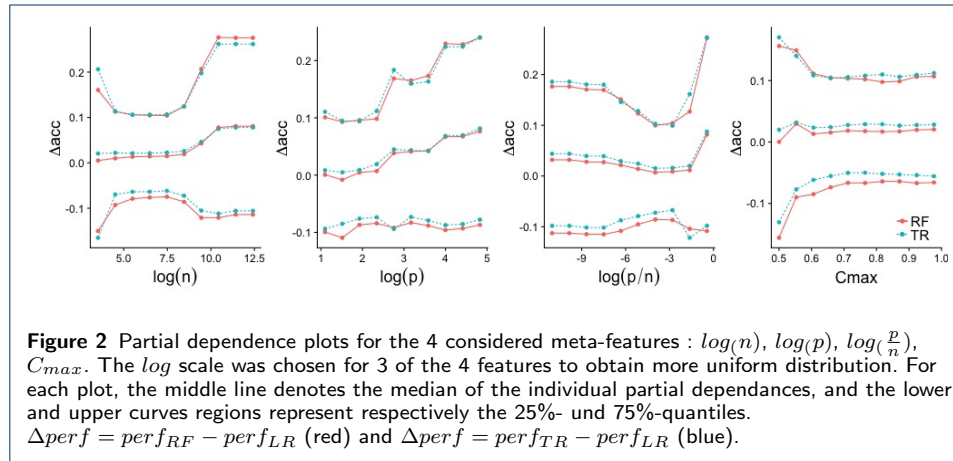

**Table 1** Performances of LR and RF (for the 67 datasets from biosciences/medicine) (top: accuracy, middle: AUC, bottom: Brier score): mean performance  $\mu$ , standard deviation  $\sigma$  and confidence interval for the mean (estimated via the bootstrap BCa method). It can be seen from this table that RF performs significantly better than LR for all three measures.

| <b>Accuracy</b>     | $\mu$    | $\sigma$ | BCa confidence interval |
|---------------------|----------|----------|-------------------------|
| Logistic regression | 0.80408  | 0.13942  | [0.76939, 0.83782]      |
| Random forest       | 0.81853  | 0.15133  | [0.78037, 0.85226]      |
| Tune Ranger         | 0.82744  | 0.14123  | [0.79109, 0.85919]      |
| Difference RF-LR    | 0.01444  | 0.07919  | [-0.00215, 0.03531]     |
| Difference TR-LR    | 0.02336  | 0.07576  | [0.00707, 0.04504]      |
| <b>auc</b>          |          |          |                         |
| Logistic regression | 0.80827  | 0.15360  | [0.76742, 0.84302]      |
| Random forest       | 0.83074  | 0.17393  | [0.78509, 0.86931]      |
| Tune Ranger         | 0.83930  | 0.15742  | [0.79609, 0.87179]      |
| Difference RF-LR    | 0.02247  | 0.08918  | [0.00342, 0.04551]      |
| Difference TR-LR    | 0.03103  | 0.08094  | [0.01359, 0.05542]      |
| <b>Brier Score</b>  |          |          |                         |
| Logistic regression | 0.14910  | 0.10586  | [0.12474, 0.17646]      |
| Random forest       | 0.12479  | 0.09302  | [0.10331, 0.14734]      |
| Tune Ranger         | 0.11632  | 0.08599  | [0.09646, 0.13707]      |
| Difference RF-LR    | -0.02431 | 0.06295  | [-0.04033, -0.01107]    |
| Difference TR-LR    | -0.03277 | 0.06510  | [-0.05049, -0.01936]    |
